# Supplementary material for: Modulation of gut microbiota and hypoglycemic/hypolipidemic activity of flavonoids from the fruits ofLycium barbarumon high-fat diet/streptozotocin-induced type 2 diabetic mice
Source: Royal Society of Chemistry journal article supplement (doi:10.1039/d2fo01268e), 2022-01-01
Supplement: d2fo01268e1.pdf [file d2fo01268e1.pdf]

**Modulation of gut microbiota and hypoglycemic/hypolipidemic activity of flavonoids from the fruits of *Lycium barbarum* on high-fat diet/streptozotocin-induced type 2 diabetic mice**

Tingting Yang<sup>a</sup>, Wangting Zhou<sup>a</sup>, Weiqi Xu<sup>a</sup>, Linwu Ran<sup>b</sup>, Yamei Yan<sup>c</sup>, Lu Lu<sup>c</sup>, Jia Mi<sup>c</sup>, Xiaoxiong Zeng<sup>a,\*</sup> and Youlong Cao<sup>c,\*</sup>

<sup>a</sup> College of Food Science and Technology, Nanjing Agricultural University, Nanjing 210095, Jiangsu, China

<sup>b</sup> Laboratory animal center of Ningxia Medical University, Yinchuan 750004, Ningxia, China

<sup>c</sup> Institute of Wolfberry Engineering Technology, Ningxia Academy of Agricultural and Forestry Sciences, Yinchuan 750002, Ningxia, China

---

\* To whom correspondence should be addressed. Tel & Fax: +86 25 84396791, E-mail: [zengxx@njau.edu.cn](mailto:zengxx@njau.edu.cn) (X. Zeng); +86 951 6886783; E-mail address: [youlongchk@163.com](mailto:youlongchk@163.com) (Y. Cao)

| Target gene   | Primer Sequence (5' - 3')                                    | Annealing T (°C) |
|---------------|--------------------------------------------------------------|------------------|
| GAPDH         | FW: GGACTTACAGAGGTCCGCTT<br>RV: CTATAGGGCCTGGGTCAGTG         | 59               |
| TLR-4         | FW: GCTCTCAGCCATCCACAAAG<br>RV: GAGTCGGGAAGAGGAAGAGG         | 60               |
| TNF- $\alpha$ | FW: CTCATGCACCACCATCAAGG<br>RV: ACCTGACCACTCTCCCTTTG         | 60               |
| IL-6          | FW: TAGTCCTTCCTACCCCAATTT<br>RV: TTGGTCCTTAGCCACTCCTTC       | 60               |
| IL-10         | FW: AGTACAGCCGGGAAGACAAT<br>RV: TCTAGGAGCATGTGGCTCTG         | 59               |
| IFN- $\gamma$ | FW: AGCTCTTCCTCATGGCTGTT<br>RV: GGTCAACCAACCACAAGCAT         | 59               |
| GK            | FW:<br>AAAACACGTATGGAACAGGGTG<br>RV: TTAGCCAGCGGATTACAGCA    | 60               |
| G6Pase        | FW: TCTACCTTGCGGCTCACTTTC<br>RV: GAAAGTTTCAGCCACAGCAAT       | 59               |
| PEPCK         | FW: GCAGAGCATAAGGGCAAGGT<br>RV: TTGCCGAAGTTGTAGCCAAA         | 59               |
| PFK           | FW: ACCGTGGACCTGGAGAAA<br>RV: AGCCCTGACAGCAGCATT             | 60               |
| PPAR $\alpha$ | FW: TCATCAAGAAGACCGAGTCC<br>RV: CCTCTTCATCCCCAAGCGTA         | 60               |
| PPAR $\gamma$ | FW: GCTGAACGTGAAGCCCATCG<br>RV: GGCGAACAGCTGAGAGGACT         | 60               |
| FAS           | FW: GGCACCTATGGCGAGGACTT<br>RV: GCCCTCCCGTACACTCACTC         | 60               |
| ACC           | FW: AAAGGCTATGTGAAGGATG<br>RV: TCTGAAGAGGTTAGGGAAG           | 59               |
| SREBP-1c      | FW: GGCACCTAAGTGCCCTCAACCT<br>RV:<br>GCCACATAGATCTCTGCCAGTGT | 60               |

**Table S1.** Primer sequences used in RT-qPCR assays in colonic tissue.

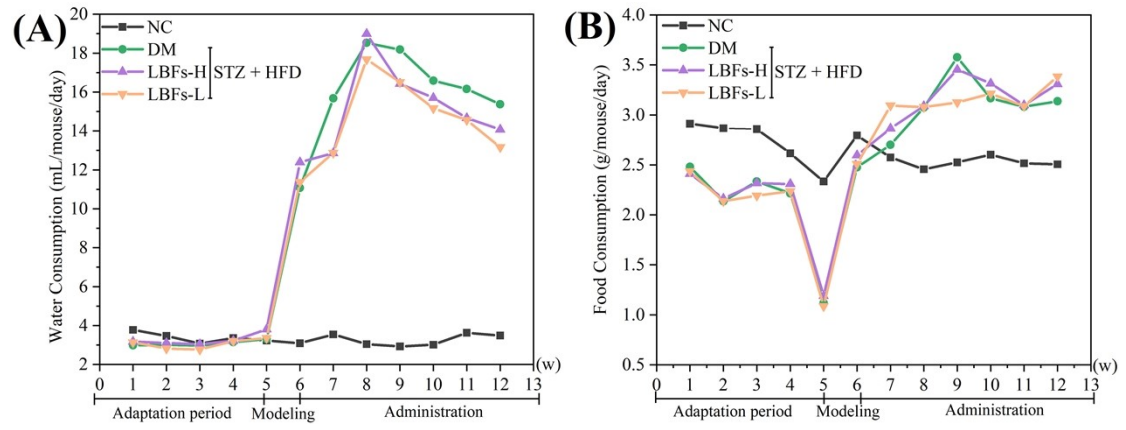

**Fig. S1.** Water consumption (A) and food consumption (B) of the four groups.

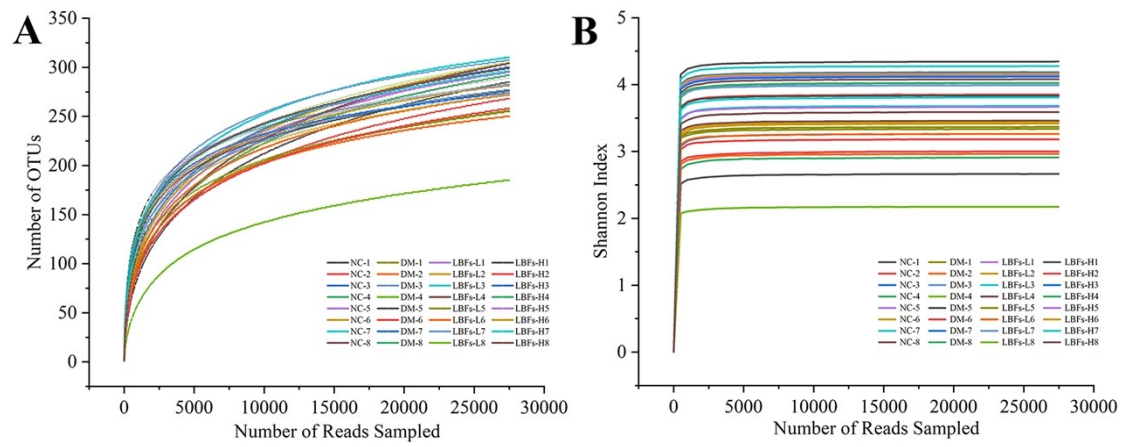

**Fig. S2.** Rarefaction curves (A) and Shannon-Wiener curves (B) of the four groups.

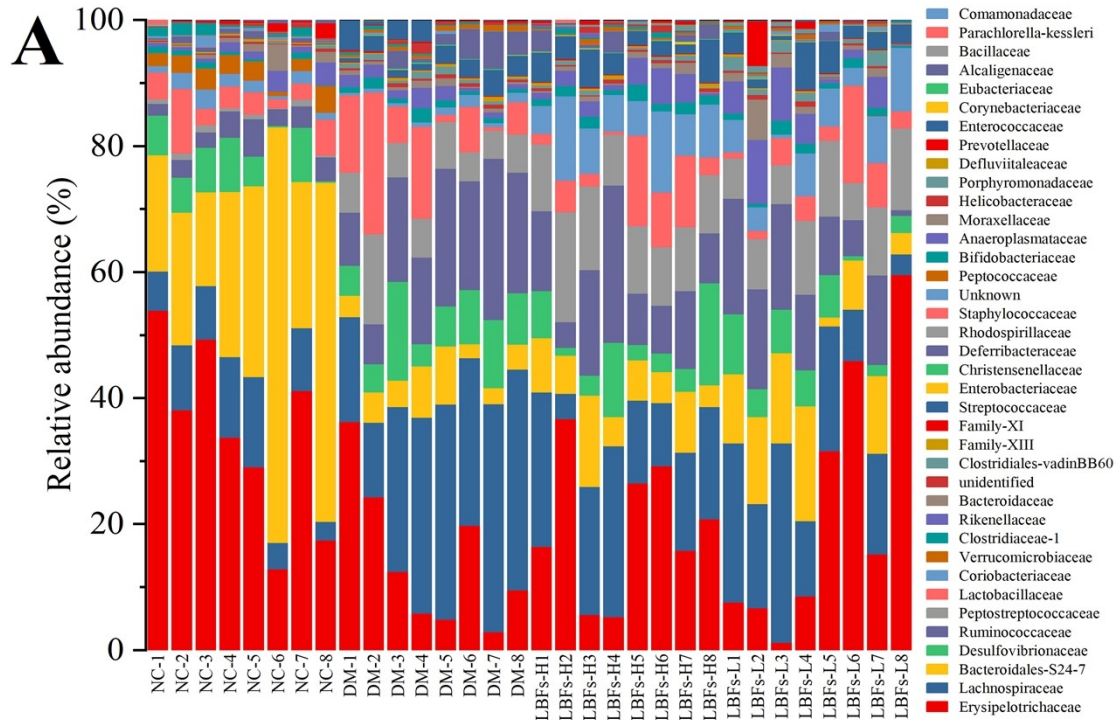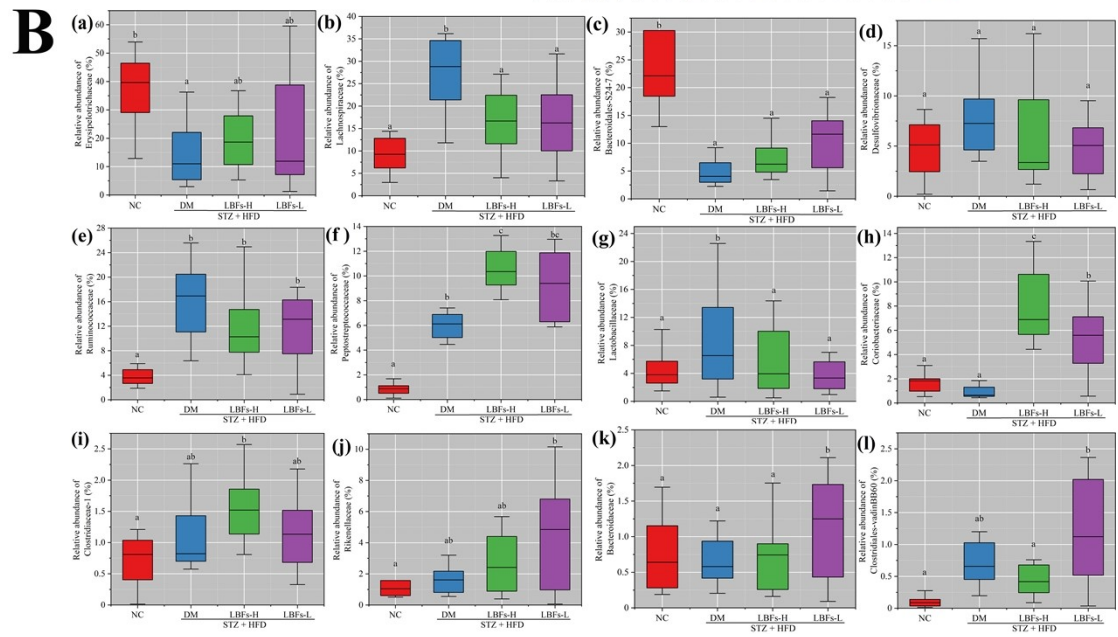

**Fig. S3.** Bacterial taxonomic profiling at the family level of gut microbiota. (A) bacterial taxonomic profiling at the family level of gut microbiota; (B) comparative analysis of 12 most relative abundance of gut microbiota at the family level. a-d represent significant differences among different groups by one-way ANOVA procedure followed by Tukey's HSD test ( $p < 0.05$ ).
